# Supplementary material
Source: PubMed Central journal article supplement (PMC5510287)
Supplement: supp_5.2.E454_2016-0166-original-submission.pdf [file supp_5.2.E454_2016-0166-original-submission.pdf]

# GEOSPATIAL ANALYSIS TO EXPLORE ACCESS TO HYPERACUTE STROKE SERVICES ACROSS CANADA

Prasanna Venkatesan Eswaradass<sup>1</sup>, Richard H. Swartz<sup>7</sup>, Jamey Rosen<sup>8</sup>, Michael D Hill<sup>1,2,3,4,5</sup>, and M.Patrice Lindsay<sup>6</sup>

<sup>1</sup>Calgary Stroke Program, Department of Clinical Neurosciences, Cumming School of Medicine, University of Calgary.

<sup>2</sup>Department of Radiology, Cumming School of Medicine, University of Calgary.

<sup>3</sup>Department of Community Health Sciences, Cumming School of Medicine, University of Calgary.

<sup>4</sup>Department of Medicine, Cumming School of Medicine, University of Calgary.

<sup>5</sup>Hotchkiss Brain Institute.

<sup>6</sup>Heart and Stroke Foundation, Director of Stroke, Toronto.

<sup>7</sup>Department of Medicine (Neurology) Sunnybrook Health Sciences Centre, University of Toronto.

<sup>8</sup>Principal Geoscientist. Geosyntec Consultants, Guelph.

## Correspondence to:

Patrice Lindsay RN PhD

Director, Stroke

Heart and Stroke Foundation Canada

222 Queen Street, Ottawa, Ontario

K1Y 5P9

PH: 613-691-4031

Email: plindsay@hsf.ca

**Word Count:** Title characters 71; Abstract words 248; Article words 2447; References 20; Tables: 3;

Figures: 3

**Key words:** Geospatial mapping; Stroke; Drive time polygon; EMS; endovascular therapy

**ABSTRACT:**

**BACKGROUND:** Treatment for stroke is time sensitive. Canada's vast geography creates challenges for ensuring prompt transport to hospital. We sought to determine the proportion of people across various provinces in Canada for whom hyperacute emergency stroke services are accessible within evidence-based time targets via transport by emergency medical services (EMS).

**METHODS:** We calculated "drive time polygons" on a map of Canada that delineated the area around stroke centers and EMS stations to which one can drive in 3.5 to 6 hours for the 8 provinces with available data. We calculated the proportional area of each forward sorting postal code zone contained within a drive-time polygon. We applied this ratio to the 2011 Canadian Census population of the FSA to estimate the population that can reach a stroke center in designated time.

**RESULTS:** Among the 8 provinces with known EMS center locations, 48%-97% of the population by province live within a drive time of 4.5 hours and 53-97% of the population live within 6 hours by road EMS. Assuming 5-hour total travel time by EMS from base to patient and patient to hospital by road, 85-100% of the population has access to a current or proposed endovascular site.

**CONCLUSION:** Most Canadians live within six hours' road access to a stroke center. Geospatial mapping could be used to inform decisions for additional sites and identify gaps in service accessibility. Coordinated systems of care and ambulance bypass agreements must continue to evolve to ensure maximal access to time-sensitive emergency stroke services.

**INTRODUCTION:**

Stroke is an acute neurological emergency with major public health impact. (1) Hyperacute treatment for stroke is evolving rapidly, with implications for service delivery and for equitable access to evolving standards of care. About 85% of strokes in North America are ischemic. The primary treatment of acute ischemic stroke is administration of intravenous alteplase (rtPA) (2) but outcome is highly associated with speed of access, measured by onset-to-treatment (OTT) time. (3,4) A majority of stroke patients do not receive treatment because they present too late or have medical contraindications to treatment. Stroke centers and dedicated stroke teams can continually improve the quality of treatment offered to patients who arrive within evidence-based time windows to warrant treatment. Implementation of a comprehensive system of stroke care has increased the role of Emergency Medical Services (EMS) for stroke patient transport.

Early identification of stroke, and protocols to enable rapid transport via EMS, have resulted in reduced onset to treatment times, reduced inter-facility transfer delays, and increased rates of thrombolysis administration for acute ischemic stroke.(5,6,7) The recent establishment of endovascular therapy for ischemic stroke patients places even greater demands on systems of care, with fewer centres able to support 24/7 neuro-intervention. Every minute delay in reperfusion results in a loss of 1.9 million neurons (8). With endovascular therapy, the odds of benefit reduce with every hour of delay from onset to arterial puncture(9). Given the need for rapid treatment, geographically dispersed populations may not be able to benefit from either alteplase or endovascular thrombectomy.

Canada's vast geography creates challenges for ensuring prompt transport to hospital. To inform ongoing system planning and improvement efforts towards optimal stroke services delivery, we sought to determine the proportion of people across several provinces for whom hyperacute stroke services are currently accessible by EMS.

**METHODS:**

The population with access to stroke centers in sufficient time for treatment was estimated by province using the 2011 Canadian population census. The area within which residents can be reached by an ambulance (traveling by road) and then driven to a stroke hospital was compared with the population in those regions (based on forward-sorting postal codes, i.e., the areas defined by the first three digits of a postal code) to determine the portion of residents that can reach a hospital between 3.5 and 6 hours of contacting emergency services. (Figure 1)

We used geospatial analyses with Geographic Information Systems (GIS) technology (10,11,12) to generate Drive-Time Polygons. The addresses of hospitals with comprehensive and advanced stroke centers and the addresses of Emergency Medical Service (EMS) centers were geocoded to assign geographic coordinates (latitude and longitude). These addresses were available for 8 provinces (EMS locations for Nova Scotia and Quebec not available); therefore, the analysis was limited to these regions. Once geocoded, Drive Time Polygons were calculated for each hospital and EMS station using the ArcGIS Online World Routing Service algorithm. This algorithm delineates the spatial extent to which one can drive from a starting point within a given duration, assuming average drive times per road segment. While this algorithm assumes average civilian drive times, emergency vehicles generally drive faster, resulting in larger drive-time polygons. This assumption results in an underestimation of the population with sufficient access to stroke centers.

Drive-Time Polygons were calculated with the simplified assumption that at least half of the journey to the hospital would be spent by an ambulance traveling to a patient location and half by the ambulance traveling from the patient location to the stroke center. Drive-time polygons were thus calculated at 1.75, 2.25, 2.5, and 3 hours (i.e., half of 3.5, 4.5, 5, and 6 hours' total drive time) around each stroke center and EMS station. The actual travel duration (in addition to driving times) would be increased by the on-site time incurred by EMS personnel (median range of 16 to 24 minutes across provinces) (1). Thus the 3.5-hour drive time is potentially closer to 3 hours and 45 minutes when the on-site time is included. Drive-time polygons were then spatially intersected with the forward-sorting postal codes to identify the regions within

1  
2  
3 which residents were in access to both a stroke center and EMS drive-time polygon (the  
4 “serviced region”). This method assumes that road ambulance is the only method by which  
5 residents can travel to a stroke center.  
6  
7  
8

9  
10 Forward-sorting postal codes with associated 2011 populations provided by Statistics Canada  
11 were used to estimate the population inside and outside the serviced region. The ratio of the  
12 serviced area to the forward-sorting postal code area multiplied by the population within the  
13 associated forward-sorting postal code represents the portion of residents with access to a  
14 stroke center within the associated duration. The populations within the serviced regions were  
15 summed for each province to calculate the provincial totals. This method assumes that  
16 residents suffer from a stroke at home (or at a location within their home forward sorting  
17 postal code).  
18  
19  
20  
21  
22  
23  
24

25  
26 Further analyses were conducted to examine access to acute endovascular therapy for large  
27 vessel ischemic stroke, a newer therapy that is only available in a limited number of  
28 comprehensive stroke centers with the necessary equipment and professional expertise to  
29 perform the procedure and care for the patient afterwards. This procedure can be offered to  
30 eligible stroke patients who can get to hospital within 5 hours of stroke onset (13).  
31  
32  
33  
34  
35  
36  
37  
38

### 39 **RESULTS:**

40  
41 We included 456 EMS locations and 637 hospitals and calculated the Drive-Time Polygons on a  
42 map of 8 of the 10 provinces in Canada with available data. Among the 8 provinces, Alberta  
43 with 229 EMS locations and 96 hospitals, and Ontario with 82 EMS locations and 165 hospitals  
44 had the largest numbers of EMS locations and hospitals. As an example of a smaller province,  
45 PEI had just 4 hospitals and 6 EMS locations. Hospital administrative data shows that 69% of  
46 admitted stroke cases in Canada are transported to hospital emergency departments by EMS in  
47 Canada. (Table 1)  
48  
49  
50  
51  
52  
53  
54

55 Among the 8 provinces studied in this cross-sectional snap-shot, an estimated 79% of the  
56 population has predicted access to hyperacute stroke services either via EMS or self-drive. This  
57  
58  
59  
60

1  
2  
3 represents the maximum proportion of the population who could benefit from time-sensitive  
4 therapies. As an example by province, among the population of Alberta (3,645,081) 89%, 92%  
5 and 93% of population of Alberta lived within 3.5, 4.5 and 6 hours' drive from a stroke center  
6 via EMS. (Figure 2) Further, 94%, 98% and 99% of population of Alberta lived within 3.5, 4.5 and  
7 6 hours of self-drive (i.e., without EMS) from a stroke center. The mean percentage of Alberta  
8 population within the services area is 92%. In Ontario 96%, 97% and 97% of population lived  
9 within 3.5, 4.5 and 6 hours' drive from a stroke center via EMS. Whereas, 98%, 100% and 100%  
10 of population lived within 3.5, 4.5 and 6 hours of self-drive from a stroke center. (Table 2) Other  
11 provinces showed similar results.  
12  
13  
14  
15  
16  
17  
18  
19

20  
21 Only 44% and 41% of population of Saskatchewan and Newfoundland and Labrador provinces  
22 lived within 3.5 hours drive from stroke center via EMS. It increased to 47% and 52% for 4.5  
23 hours' drive and 53% and 84% respectively for 6 hours' drive. Within Saskatchewan, 59%, 93%  
24 and 93% of population lived within 3.5, 4.5 and 6 hours of self-drive from a stroke center. These  
25 data reflects the larger proportion of the populations of these provinces living in rural and  
26 remote areas where EMS and stroke-enabled hospital access is geographically  
27 challenging.(Figure 3)  
28  
29  
30  
31  
32  
33  
34

35 A sub-analysis was conducted to understand access to recently implemented acute  
36 endovascular treatment across Canada. A major Canadian clinical trial on endovascular care  
37 (ESCAPE) included 11 sites, and an additional 10 sites have implemented this treatment or are  
38 in planning stages. Assuming a 5-hour travel time by EMS from base to patient and then from  
39 patient to hospital, 76% of the country's population has access to a site that participated in  
40 ESCAPE, 78% of the country's population has access to a proposed additional endovascular site  
41 and 92% of the country's population has access overall to a current or proposed endovascular  
42 site (Table 3).  
43  
44  
45  
46  
47  
48  
49  
50

### 51 **DISCUSSION:**

52  
53

54 In our study, among the 8 provinces included, a high proportion of the population has potential  
55 access to acute stroke treatment with intravenous alteplase, and 85% to 99% with access to  
56 acute endovascular therapy in provinces where this is available. However, there is significant  
57  
58  
59  
60

1  
2  
3  
4  
5  
6  
7  
8  
9  
10  
11  
12  
13  
14  
15  
16  
17  
18  
19  
20  
21  
22  
23  
24  
25  
26  
27  
28  
29  
30  
31  
32  
33  
34  
35  
36  
37  
38  
39  
40  
41  
42  
43  
44  
45  
46  
47  
48  
49  
50  
51  
52  
53  
54  
55  
56  
57  
58  
59  
60

variability. With private transport (a one-way trip), 86% to 100% of the population, varying by province) lives within a 4.5 hours' drive of a stroke center. With EMS (to home and then to hospital), between 48% and 96% live within 4.5 hours and 53% to 97% of the populations live within 6 hours by road EMS.

In Canada, 69% of admitted stroke patients are transported by EMS, yet the Canadian Stroke Best Practice Recommendations have established a target for EMS transport at 80%.<sup>(13)</sup> From the North Carolina Stroke Care Collaborative registry, it was noted that arrival by EMS (versus private transport) was associated with faster access to brain imaging and faster interpretation of these images <sup>(14)</sup> Canada's vast geography, challenging landscapes and climate makes it almost impossible to get all patients to hospital in early enough time frames to allow even fast door to treatment times to occur. People living in rural and remote locations in general have challenges accessing emergency medical services for urgent conditions. Similar patterns of access limitations to what we observed in this study have been seen in acute coronary syndrome access and in trauma care.<sup>(15)</sup>

The ESCAPE trial delivered rapid endovascular therapy to stroke patients with proximal intracranial occlusion on the basis of imaging at 11 sites in Canada improving clinical outcome and reducing mortality. <sup>(16)</sup> The significant difference between the trial and the current analysis is that the proposed sites cover the large population centers of Vancouver and Winnipeg. One pan-Canadian study similarly used geospatial tools to estimate the proportion of population with 60, 90 and 120-minute access to a hospital with the minimum requirements to treat stroke (a 3rd or 4th generation CT scanner, a neurologist and an emergency physician on staff). Based on 1991 and 1996 census counts, 67.3% of Canadians lived within 60 minutes of such a center, 78.2% within 90 minutes and 85.3% within 120 minutes. <sup>(17)</sup> Another study in Ontario found that access to hospitals with specialized services (including interventional cardiology centers) varied by geography, with rural areas having significantly less access. Overall, 40.5% of the population had access to a hospital with specialized services within 30 minutes, 72.2% had access within one hour and 96.5% had access within 4 hours. <sup>(18)</sup> One study in Alberta used geospatial tools to estimate the change in proportion of the population

1  
2  
3 with access to a stroke center after the province increased the number of such centers  
4 (between 2002 and 2010). This study found that the proportion of Albertans with geographic  
5 access by ground transport within 15 minutes increased from 47.5% to 53.8%, and those with  
6 access within 75 minutes increased from 84.6% to 93.9%. (19)  
7  
8  
9

10  
11 This approach can be useful to inform capacity planning – e.g. extending transport windows  
12 from 4 to 6 hours makes a bigger difference in increasing access to acute stroke treatments in  
13 Newfoundland and Labrador than in Saskatchewan. By plotting potential sites, decision-makers  
14 can objectively determine which locations would have greater population reach. This  
15 information, in turn, would need to be combined with hospital capability to care for stroke  
16 patients following acute treatment, resources (human and equipment), expertise and  
17 anticipated annual volumes to justify location selection.  
18  
19

20  
21 The use of geospatial tools to estimate access to stroke services is relatively new application.  
22 These analyses depend on accurate road data and speed of travel by ambulances. One study in  
23 Calgary demonstrated that actual time to center as recorded by EMS was consistently higher  
24 than predicted by the geospatial tools, usually by between 10 and 20 minutes. Again, the error  
25 was not randomly distributed, with areas outside the city having the highest underestimates. By  
26 adjusting model assumptions to correct for this underestimate, this author estimates that  
27 access within 60 minutes to invasive cardiac services is available for 56.3% of the population,  
28 with a low of 13.5% in New Brunswick to a high of 62.7 in Ontario. (20) A similar study from  
29 Alberta found that travel time predicted with geospatial tools was approximately 70% of actual  
30 EMS time, with the greatest discrepancies occurring during the winter months and peak  
31 morning and afternoon rush hour, reflecting real-time conditions (poor weather, traffic) not  
32 often accounted for in a GIS. (19) Simple assumption of the population being equally distributed  
33 around a forward-sorting postal code will bias the results in rural areas. Instead, it is expected  
34 that a population will be heavily distributed around the road network. This bias is higher in  
35 lower-population areas, thus limiting the error. We assume that an ambulance is dispatched  
36 immediately after a stroke occurs, travels at an average road speed, and EMS spends no time at  
37 the patient residence. This will lead to errors associated with the ambulance speed compared  
38  
39  
40  
41  
42  
43  
44  
45  
46  
47  
48  
49  
50  
51  
52  
53  
54  
55  
56  
57  
58  
59  
60



1  
2  
3  
4 to the average road speed (expected to be higher), errors associated with estimating traffic (the  
5 true travel time might be higher or lower than the road averages applied given time of day and  
6 traffic disruptions), and errors associated with ignoring delays at the patient site (notably,  
7 delays associated with travel within large buildings). Some provinces and hospitals have access  
8 to air ambulance and we did not consider this possibility in our analysis. These estimates also  
9 assume that patients or witnesses will contact Ems as soon as stroke symptoms begin.

10  
11 Canadian stroke quality monitoring data reveals significant delays in first contact with EMS or  
12 first presentation to an emergency department by private transport [1]. These delays in  
13 contact may result in reduced numbers of patients arriving in specified time windows, even if  
14 they reside within a 6 hour drive time. Finally, provinces with a greater rural population may be  
15 underestimated because local private EMS providers could not be identified.

16  
17  
18 In conclusion, our study reports on the predicted access of the Canadian population to stroke  
19 centers that provide time-sensitive acute treatments. The majority of Canadians live within six  
20 hours' road access to a stroke center. Coordinated systems of care and ambulance bypass  
21 agreements must continue to evolve to ensure maximal access to hyperacute services. The  
22 public need to be aware of the signs of stroke and contact EMS without delay to maximize  
23 eligibility for these time-sensitive treatments. Geospatial analysis may help estimate coverage  
24 for specific stroke services (e.g. intra-arterial clot retrieval), and other medical or surgical  
25 emergencies. This methodology could be broadly applied in healthcare to inform decisions for  
26 resource allocation to maximize population access, and to identify gaps in service accessibility  
27 across a range of health conditions and across geographic regions globally.

28  
29  
30  
31  
32  
33  
34  
35  
36  
37  
38  
39  
40  
41  
42  
43  
44  
45  
46  
47  
48  
49  
50  
51  
52  
53  
54  
55  
56  
57  
58  
59  
60

## REFERENECEES:

1. Stroke report 2015. Heart and Stroke Foundation. Available: [www.heartandstroke.com/site/apps/nlnet/content2.aspx?c=iklQLcMWJtE&b=3485819&ct=14716657](http://www.heartandstroke.com/site/apps/nlnet/content2.aspx?c=iklQLcMWJtE&b=3485819&ct=14716657). accessed 2016 Nov 1.
2. Tissue plasminogen activator for acute ischemic stroke. The National Institute of Neurological Disorders and Stroke rt-PA Stroke Study Group. *N Engl J Med.* 1995;333(24):1581-7.
3. Saver JL, Levine SR. Alteplase for ischaemic stroke--much sooner is much better. *Lancet.* 2010;375(9727):1667-8.
4. Hacke W, Kaste M, Bluhmki E, Brozman M, Davalos A, Guidetti D, et al. Thrombolysis with alteplase 3 to 4.5 hours after acute ischemic stroke. *N Engl J Med.* 2008;359(13):1317-29.
5. Prabhakaran S, McNulty M, O'Neill K, Ouyang B. Intravenous thrombolysis for stroke increases over time at primary stroke centers. *Stroke.* 2012;43(3):875-7.
6. Prabhakaran S, Ward E, John S, Lopes DK, Chen M, Temes RE, et al. Transfer delay is a major factor limiting the use of intra-arterial treatment in acute ischemic stroke. *Stroke.* 2011;42(6):1626-30.
7. Evenson KR, Foraker RE, Morris DL, Rosamond WD. A comprehensive review of prehospital and in-hospital delay times in acute stroke care. *Int J Stroke.* 2009;4(3):187-99.
8. Saver JL. Time is brain--quantified. *Stroke.* 2006;37(1):263-6.
9. Saver JL, Goyal M, van der Lugt A, Menon BK et al.,. Time to Treatment With Endovascular Thrombectomy and Outcomes From Ischemic Stroke: A Meta-analysis. *JAMA.* 2016;316(12):1279-1288
10. Wieczorek WF, Delmerico AM. Geographic Information Systems. *Comput Stat.* 2009;1(2):167-86.
11. Longley PA GM, Maguire DJ, Rhind DW. *Geographic Information Systems and Science.* West Sussex: John Wiley & Sons, Ltd; 2005.
12. Boulos MN. Towards evidence-based, GIS-driven national spatial health information infrastructure and surveillance services in the United Kingdom. *Int J Health Geogr.* 2004;3(1):1.
13. Casaubon LK, Boulanger JM, Blacquiére D, Boucher S, Brown K, Goddard T, et al. Canadian Stroke Best Practice Recommendations: Hyperacute Stroke Care Guidelines, Update 2015. *Int J Stroke.* 2015;10(6):924-40.
14. Patel MD, Rose KM, O'Brien EC, Rosamond WD. Prehospital notification by emergency medical services reduces delays in stroke evaluation: findings from the North Carolina stroke care collaborative. *Stroke.* 2011;42(8):2263-8.
15. Lawson F, Schuurman N, Oliver L, Nathens A. Evaluating potential spatial access to trauma center care by severely injured patients. *Health & Place.* 2013;19:131-137.
16. Goyal M, Demchuk AM, Menon BK, Eesa M, Rempel JL, Thornton J, et al. Randomized assessment of rapid endovascular treatment of ischemic stroke. *N Engl J Med.* 2015;372(11):1019-30.
17. Scott PA, Temovsky CJ, Lawrence K, Gudaitis E, Lowell MJ. Analysis of Canadian population with potential geographic access to intravenous thrombolysis for acute ischemic stroke. *Stroke.* 1998;29(11):2304-10.

- 1
  - 2
  - 3
  - 4
  - 5
  - 6
  - 7
  - 8
  - 9
  - 10
  - 11
  - 12
  - 13
  - 14
  - 15
  - 16
  - 17
  - 18
  - 19
  - 20
  - 21
  - 22
  - 23
  - 24
  - 25
  - 26
  - 27
  - 28
  - 29
  - 30
  - 31
  - 32
  - 33
  - 34
  - 35
  - 36
  - 37
  - 38
  - 39
  - 40
  - 41
  - 42
  - 43
  - 44
  - 45
  - 46
  - 47
  - 48
  - 49
  - 50
  - 51
  - 52
  - 53
  - 54
  - 55
  - 56
  - 57
  - 58
  - 59
  - 60
18. Glazier, R.H., Gozdyra, P., Yeritsyan, N. (2011). Geographic Access to Primary Care and Hospital Services for Rural and Northern Communities: Report to the Ontario Ministry of Health and Long-Term Care. Toronto: Institute for Clinical Evaluative Sciences.
19. van Rheenen, S. M. (2015). A Spatial Epidemiological Analysis of Stroke in Alberta, Canada, Using GIS. PhD thesis University of Calgary
20. Patel, A.B. (2012). Evaluating geographic access to cardiac catheterization facilities to inform regionalized models of care for acute myocardial infarction. PhD thesis University of Calgary

Confidential

1  
2  
3  
4  
5  
6  
7  
8  
9  
10  
11  
12  
13  
14  
15  
16  
17  
18  
19  
20  
21  
22  
23  
24  
25  
26  
27  
28  
29  
30  
31  
32  
33  
34  
35  
36  
37  
38  
39  
40  
41  
42  
43  
44  
45  
46  
47  
48  
49  
50  
51  
52  
53  
54  
55  
56  
57  
58  
59  
60

Table 1: The percentage of admitted stroke cases transported by emergency medical services in Canada^

| CAN!           | BC                    | AB                    | SK                    | MB                    | ON                      | Q<br>C | NB                   | NS                    | PEI                 | NL                  |
|----------------|-----------------------|-----------------------|-----------------------|-----------------------|-------------------------|--------|----------------------|-----------------------|---------------------|---------------------|
| <b>69%</b>     | <b>67%</b>            | <b>75%</b>            | <b>64%</b>            | <b>65%</b>            | <b>69%</b>              |        | <b>62%</b>           | <b>73%</b>            | <b>64%</b>          | <b>68%</b>          |
| <b>25312/3</b> |                       |                       |                       |                       |                         | *      |                      |                       |                     |                     |
| <b>6704</b>    | <b>4704/<br/>7002</b> | <b>3219/<br/>4306</b> | <b>1072/<br/>1679</b> | <b>1098/<br/>1689</b> | <b>12464/1<br/>7939</b> |        | <b>832/1<br/>352</b> | <b>1069/<br/>1465</b> | <b>174/<br/>272</b> | <b>610/<br/>881</b> |

\* data on EMS transport not collected or reported in Quebec at time of analysis.

**! Overall values for Canada do not include data from Quebec**

^ Parts of this material are based on data and information provided by the Canadian Institute for Health Information. However, the analyses, conclusions, opinions and statements expressed herein are those of the author and not those of the Canadian Institute for Health Information.”

**Table 2: 2011 Population of Canadian Provinces within 4.5 hour access to a Stroke Centre by EMS based on Geographic Information Systems (GIS) Technology**

| Province                  | 2011 Census Population | Population with access to Comprehensive or Advanced Stroke Services within 4.5 hours using emergency medical services transport <sup>^</sup> |     |
|---------------------------|------------------------|----------------------------------------------------------------------------------------------------------------------------------------------|-----|
| British Columbia          | 4,400,052              | 3,356,102                                                                                                                                    | 76% |
| Alberta                   | 3,645,081              | 3,340,445                                                                                                                                    | 92% |
| Saskatchewan              | 1,033,489              | 534,826                                                                                                                                      | 52% |
| Manitoba                  | 1,208,268              | 1,057,871                                                                                                                                    | 88% |
| Ontario                   | 12,851,791             | 12,396,339                                                                                                                                   | 96% |
| New Brunswick             | 751,161                | 676,261                                                                                                                                      | 90% |
| Prince Edward Island      | 140,204                | 126,608                                                                                                                                      | 90% |
| Newfoundland and Labrador | 514,536                | 242,419                                                                                                                                      | 47% |

<sup>^</sup> Assumption that drive time of 4.5 hours is divided with 50% time from EMS starting location to patient, based on place of residence, and the other 50% of time from patient location to closest comprehensive or advanced stroke center. EMS base locations not available for Nova Scotia and Quebec.

1  
2  
3  
4  
5  
6  
7  
8  
9  
10  
11  
12  
13  
14  
15  
16  
17  
18  
19  
20  
21  
22  
23  
24  
25  
26  
27  
28  
29  
30  
31  
32  
33  
34  
35  
36  
37  
38  
39  
40  
41  
42  
43  
44  
45  
46  
47  
48  
49  
50  
51  
52  
53  
54  
55  
56  
57  
58  
59  
60

Confidential

Table 3: Population Access to Acute Endovascular Therapy Services in Canada by Province

| Province                  | 2011 Census Population | Initial Escape EVT Sites (n=11):<br>Population within 5 hour drive time |      | New EVT Sites (n=10)<br>Population within 5 hour drive time |      | All EVT Sites<br>Population within 5 hour drive time |      |
|---------------------------|------------------------|-------------------------------------------------------------------------|------|-------------------------------------------------------------|------|------------------------------------------------------|------|
|                           |                        |                                                                         |      |                                                             |      |                                                      |      |
| British Columbia          | 4,400,052              | 53,927                                                                  | 1%   | 3,677,489                                                   | 84%  | 3,728,112                                            | 85%  |
| Alberta                   | 3,645,081              | 3,410,423                                                               | 94%  | -                                                           | 0%   | 3,410,423                                            | 94%  |
| Saskatchewan              | 1,033,489              | 932,229                                                                 | 90%  | 32,553                                                      | 3%   | 932,229                                              | 90%  |
| Manitoba                  | 1,208,268              | 12,557                                                                  | 1%   | 1,122,016                                                   | 93%  | 1,122,099                                            | 93%  |
| Ontario                   | 12,851,791             | 12,315,533                                                              | 96%  | 12,545,652                                                  | 98%  | 12,545,652                                           | 98%  |
| Quebec                    | 7,902,991              | 7,025,574                                                               | 89%  | 7,336,516                                                   | 93%  | 7,403,935                                            | 94%  |
| New Brunswick             | 751,161                | 535,704                                                                 | 71%  | 740,672                                                     | 99%  | 740,672                                              | 99%  |
| Nova Scotia               | 921,727                | 871,989                                                                 | 95%  | 620,015                                                     | 67%  | 871,989                                              | 95%  |
| Prince Edward Island      | 140,204                | 139,965                                                                 | 100% | 139,965                                                     | 100% | 139,995                                              | 100% |
| Newfoundland and Labrador | 514,536                | *                                                                       | 0%   | *                                                           | 0%   | *                                                    | 0%   |
| Northwest Territories     | 41,462                 | *                                                                       | 0%   | *                                                           | 0%   | *                                                    | 0%   |
| Yukon                     | 33,897                 | *                                                                       | 0%   | *                                                           | 0%   | *                                                    | 0%   |
| Nunavut                   | 31,906                 | *                                                                       | 0%   | *                                                           | 0%   | *                                                    | 0%   |

\* Acute Endovascular therapy services not available in these provinces

Note: the "All EVT" column is not a sum of the previous two columns, but rather a spatial union with some, but not total, overlap. Hence, the result in this column will not necessarily be a summation of the row.

1  
2  
3  
4  
5  
6  
7  
8  
9  
10  
11  
12  
13  
14  
15  
16  
17  
18  
19  
20  
21  
22  
23  
24  
25  
26  
27  
28  
29  
30  
31  
32  
33  
34  
35  
36  
37  
38  
39  
40  
41  
42  
43  
44  
45  
46  
47  
48  
49  
50  
51  
52  
53  
54  
55  
56  
57  
58  
59  
60

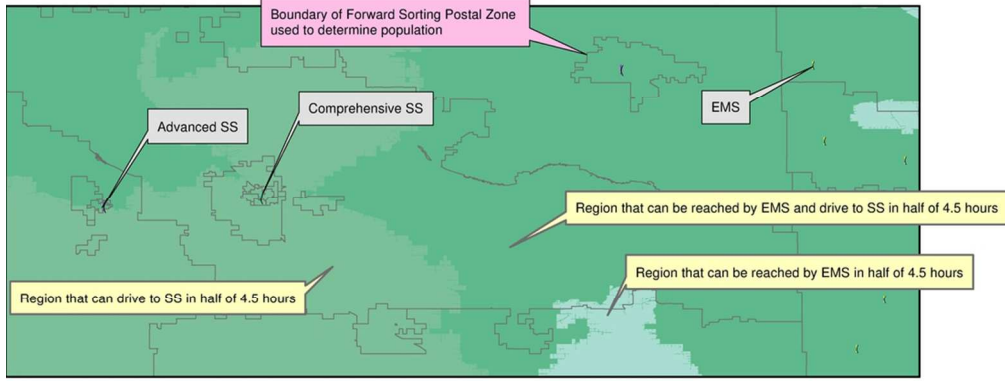

Map of Canada – Population with access to Stroke center.

92x46mm (300 x 300 DPI)

Confidential



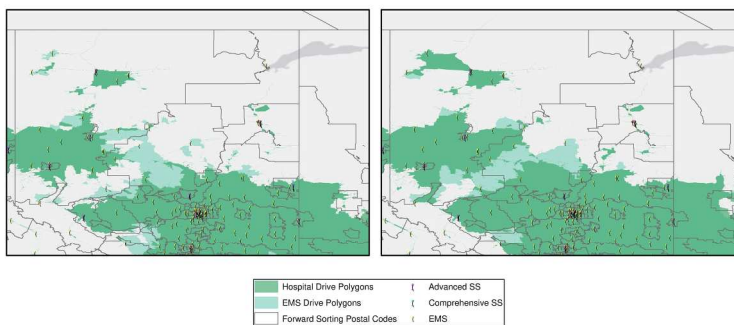

Geospatial Maps of Alberta Province. Geospatial map of Alberta province. Left: Population living within 4.5 hrs drive Right: Population living within 6 hrs drive to an advanced or comprehensive stroke center

215x166mm (300 x 300 DPI)

1  
2  
3  
4  
5  
6  
7  
8  
9  
10  
11  
12  
13  
14  
15  
16  
17  
18  
19  
20  
21  
22  
23  
24  
25  
26  
27  
28  
29  
30  
31  
32  
33  
34  
35  
36  
37  
38  
39  
40  
41  
42  
43  
44  
45  
46  
47  
48  
49  
50  
51  
52  
53  
54  
55  
56  
57  
58  
59  
60

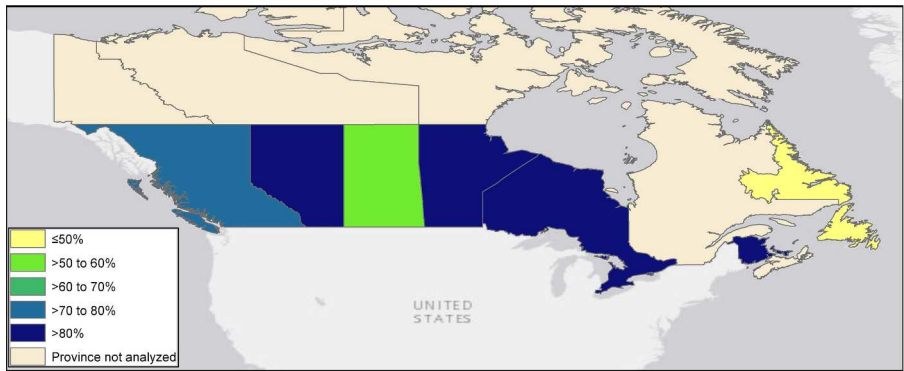

Map of Canada – Served population by province  
Population by province within a 4.5-hour drive to an Advanced or Comprehensive Stroke

226x303mm (300 x 300 DPI)
